# Supplementary material for: The effect of introducing Ga on the ZSM-5-catalyzed methanol to aromatics reaction: taking methylcyclopentane to benzene as an example
Source: Royal Society of Chemistry journal article supplement (doi:10.1039/d0cp05778a), 2021-01-01
Supplement: d0cp05778a1.pdf [file d0cp05778a1.pdf]

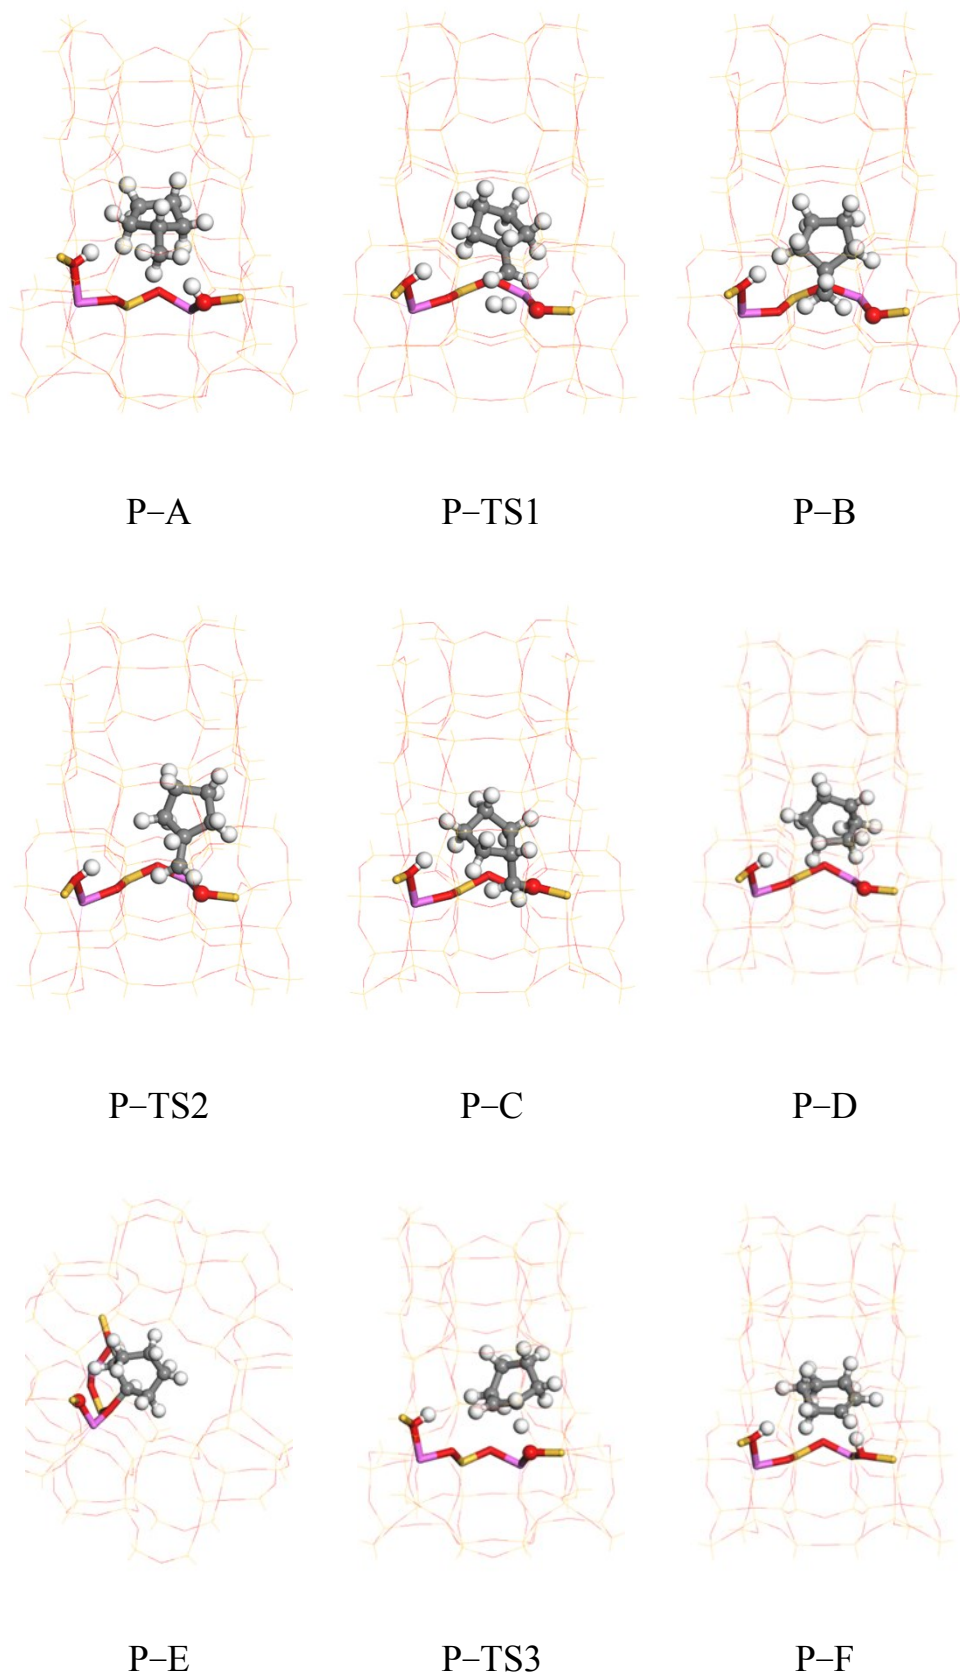

**Fig. S1** The geometry structures of reactants, products, intermediates and transition states of

methylcyclopentane to cyclohexene through primary carbon mechanism on H-Z<sub>1</sub>.

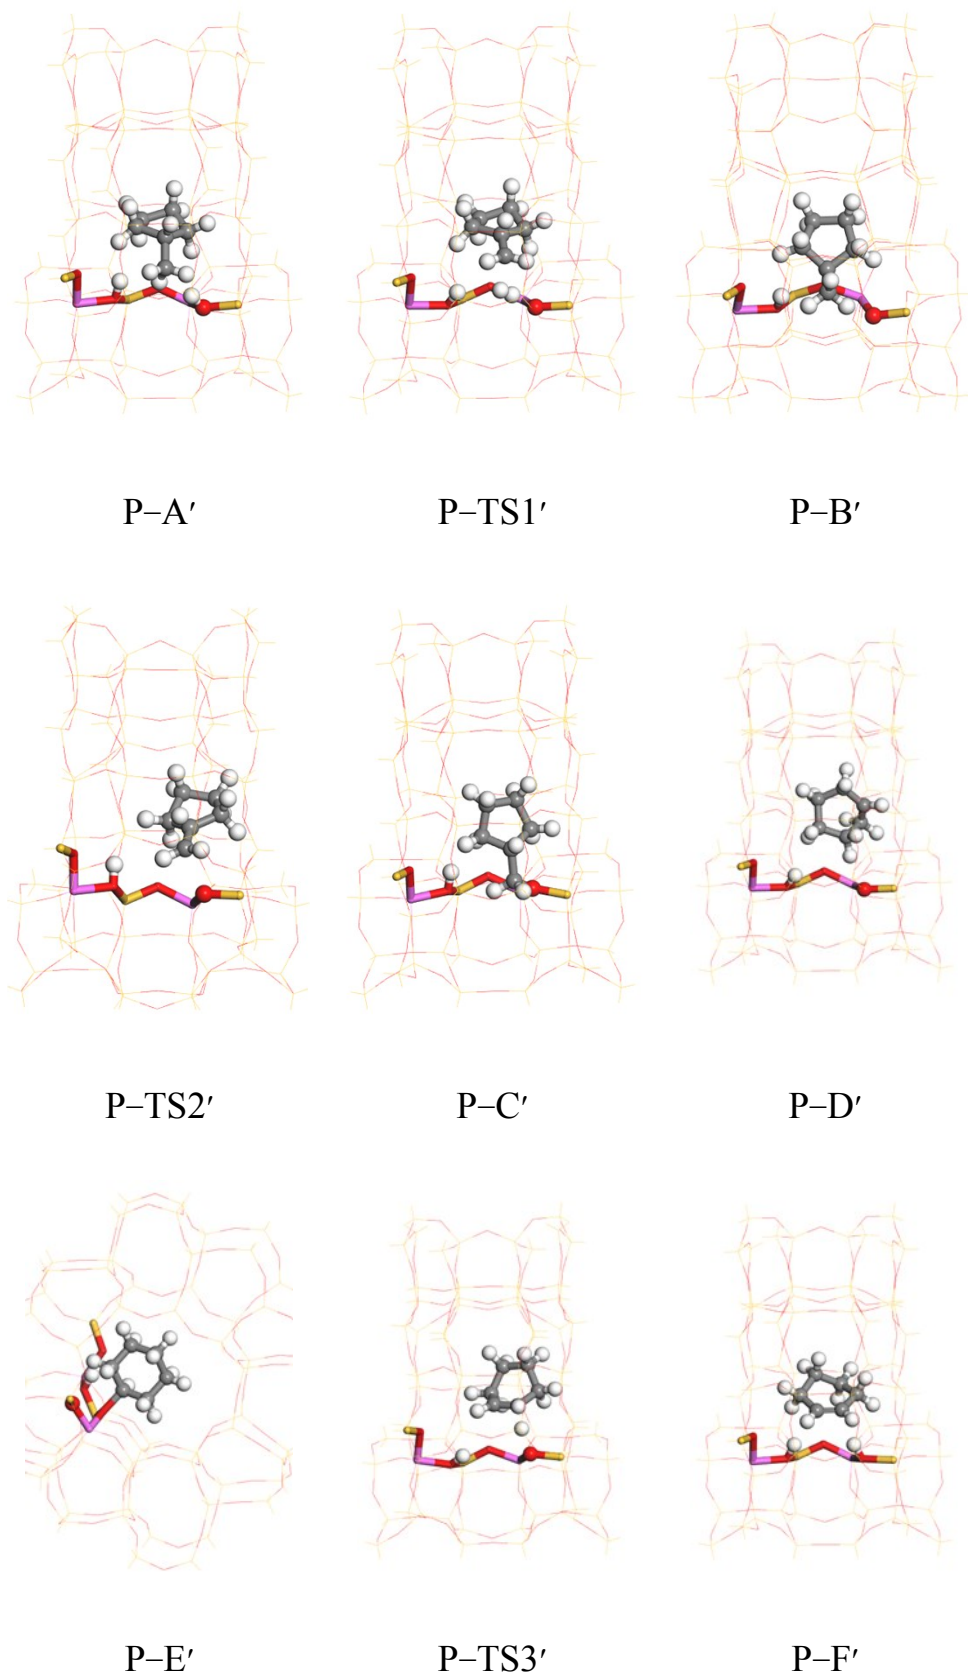

**Fig. S2** The geometry structures of reactants, products, intermediates and transition states of

methylcyclopentane to cyclohexene through primary carbon mechanism on  $H-Z_2$ .

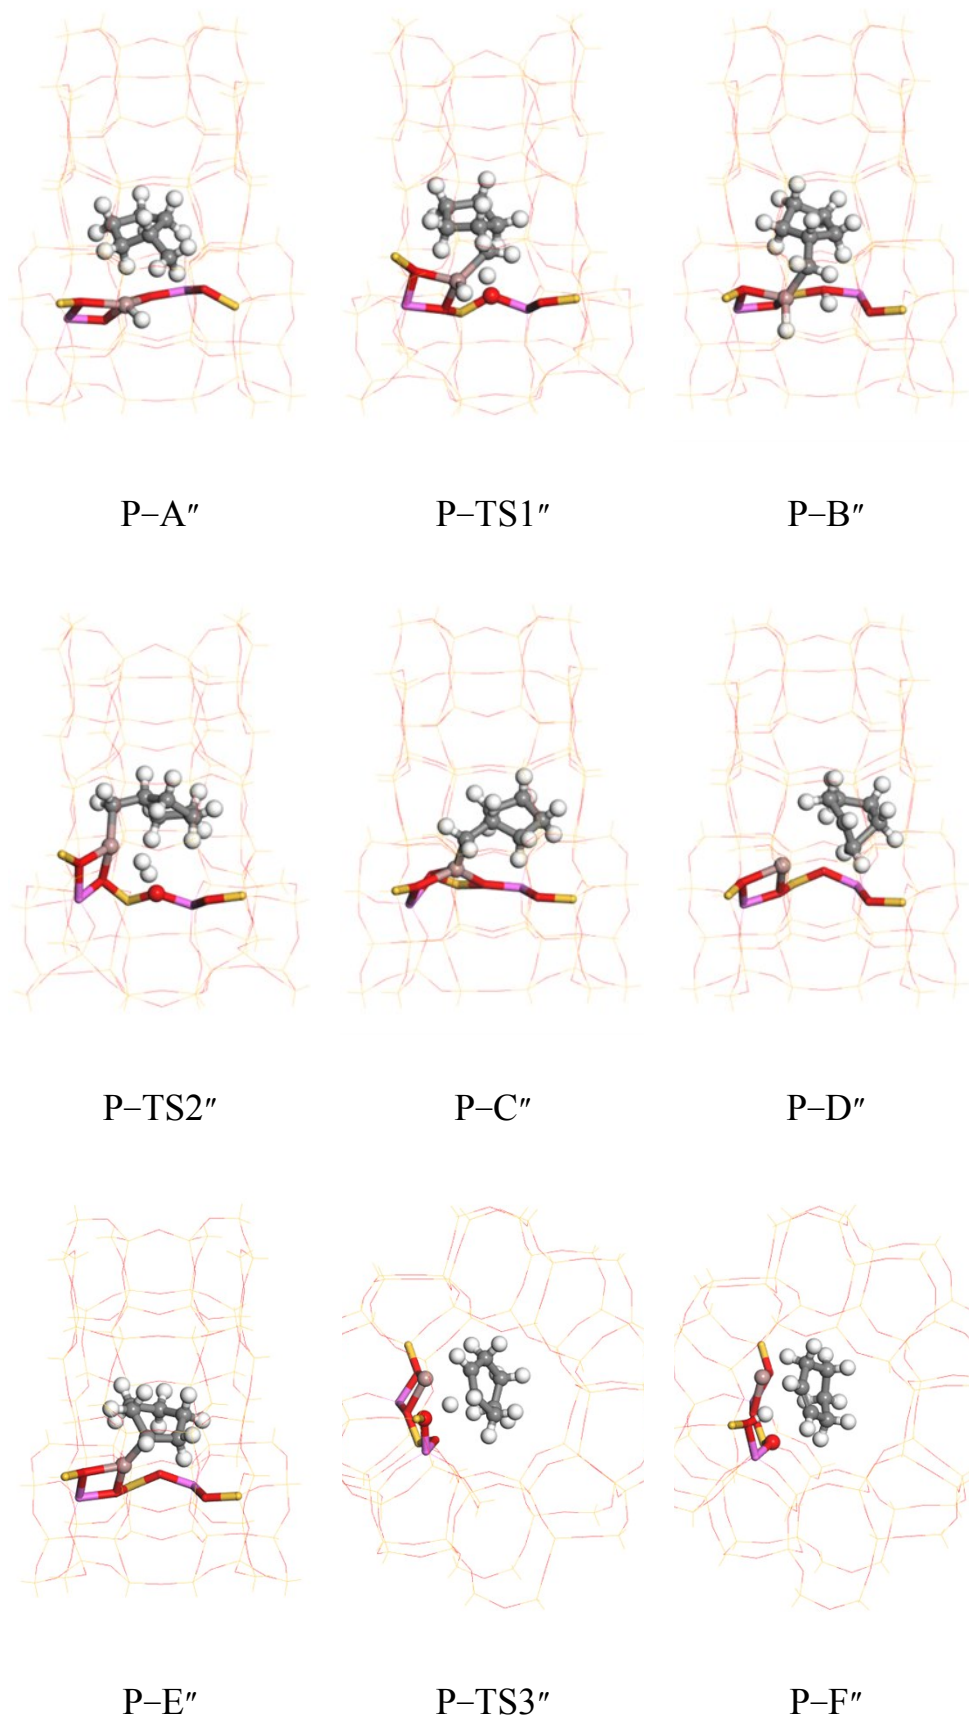

**Fig. S3** The geometry structures of reactants, products, intermediates and transition states of

methylcyclopentane to cyclohexene through primary carbon mechanism on Ga-ZSM-5.

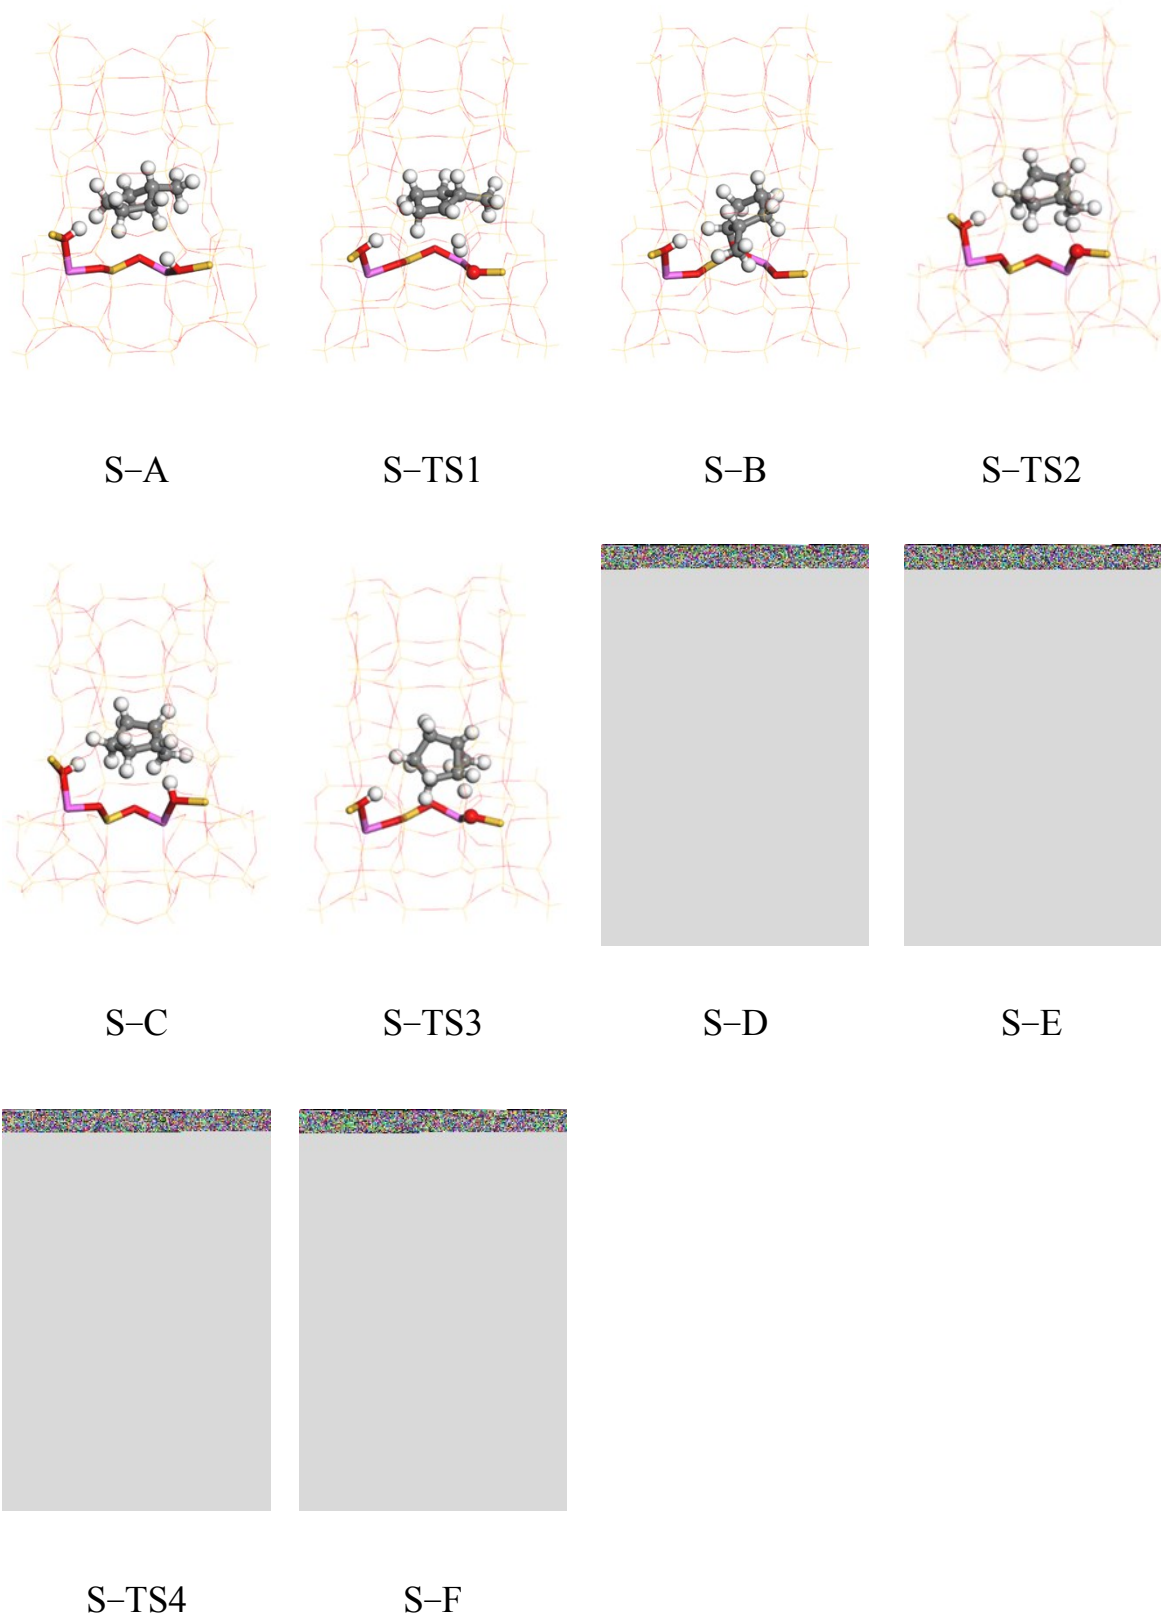

**Fig. S4** The geometry structures of reactants, products, intermediates and transition states of methylcyclopentane to cyclohexene through secondary carbon mechanism on  $H-Z_1$ .





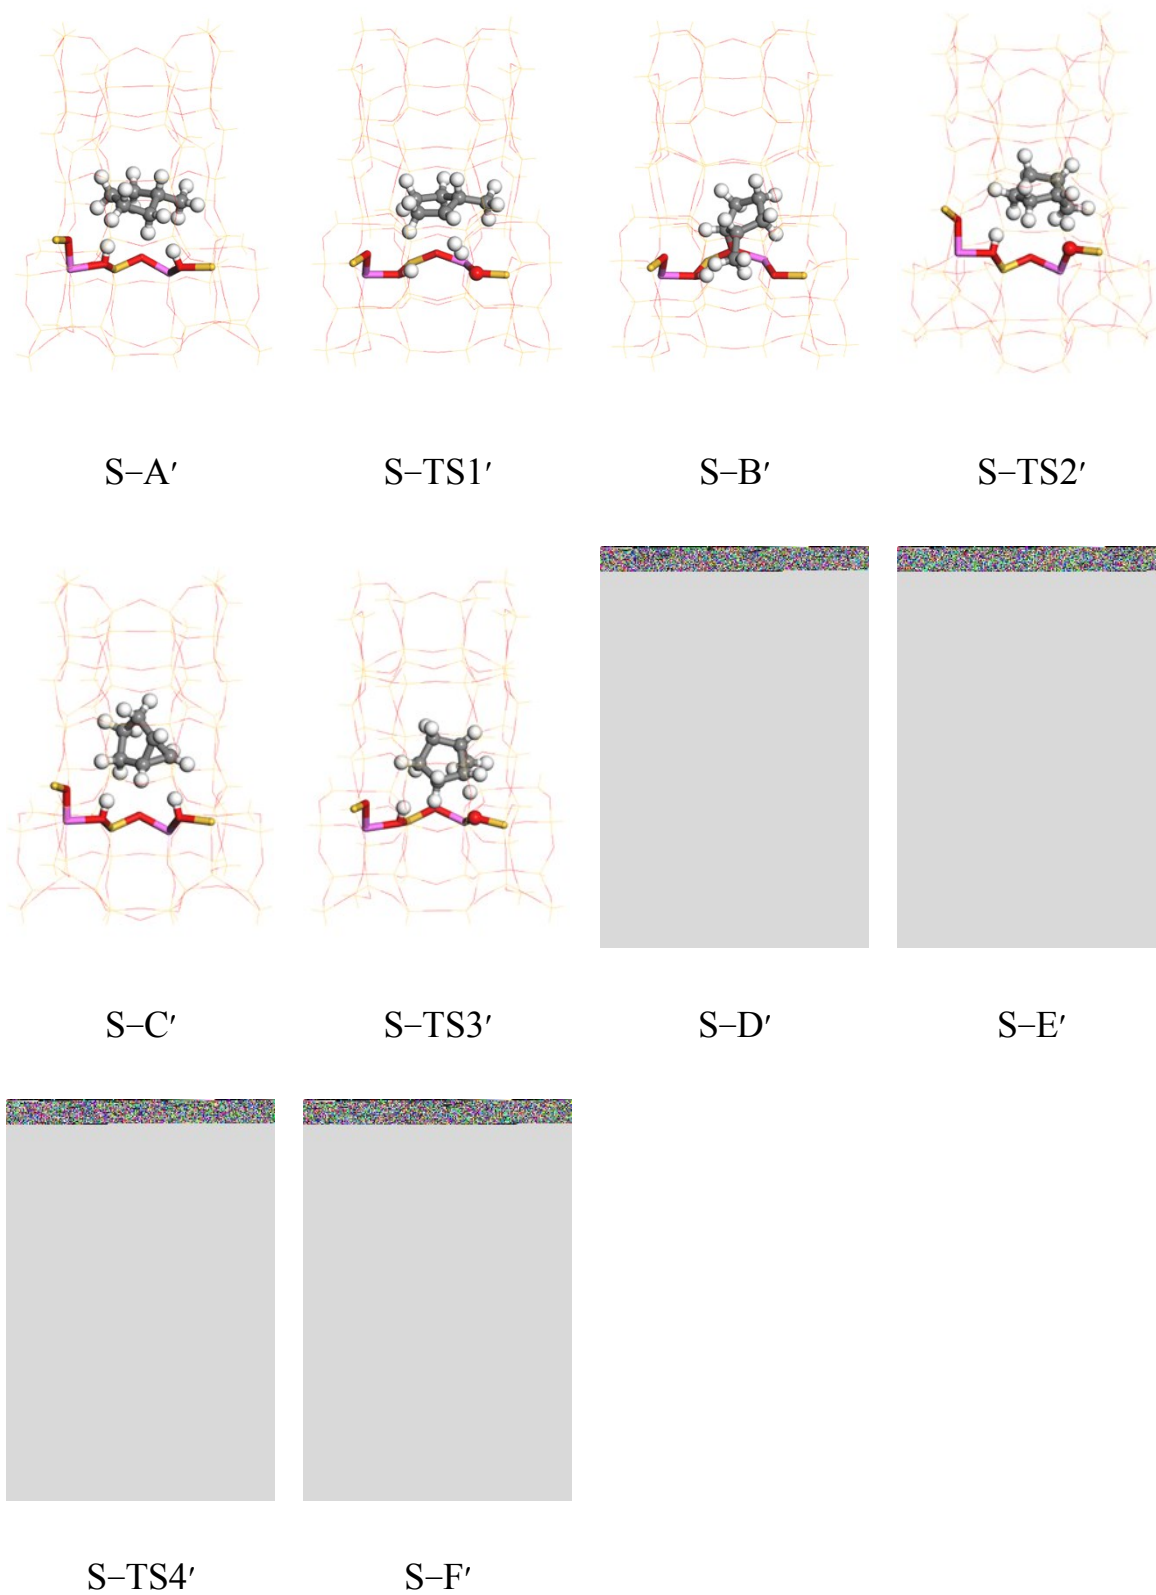

**Fig. S5** The geometry structures of reactants, products, intermediates and transition states of methylcyclopentane to cyclohexene through secondary carbon mechanism on H-Z<sub>2</sub>.



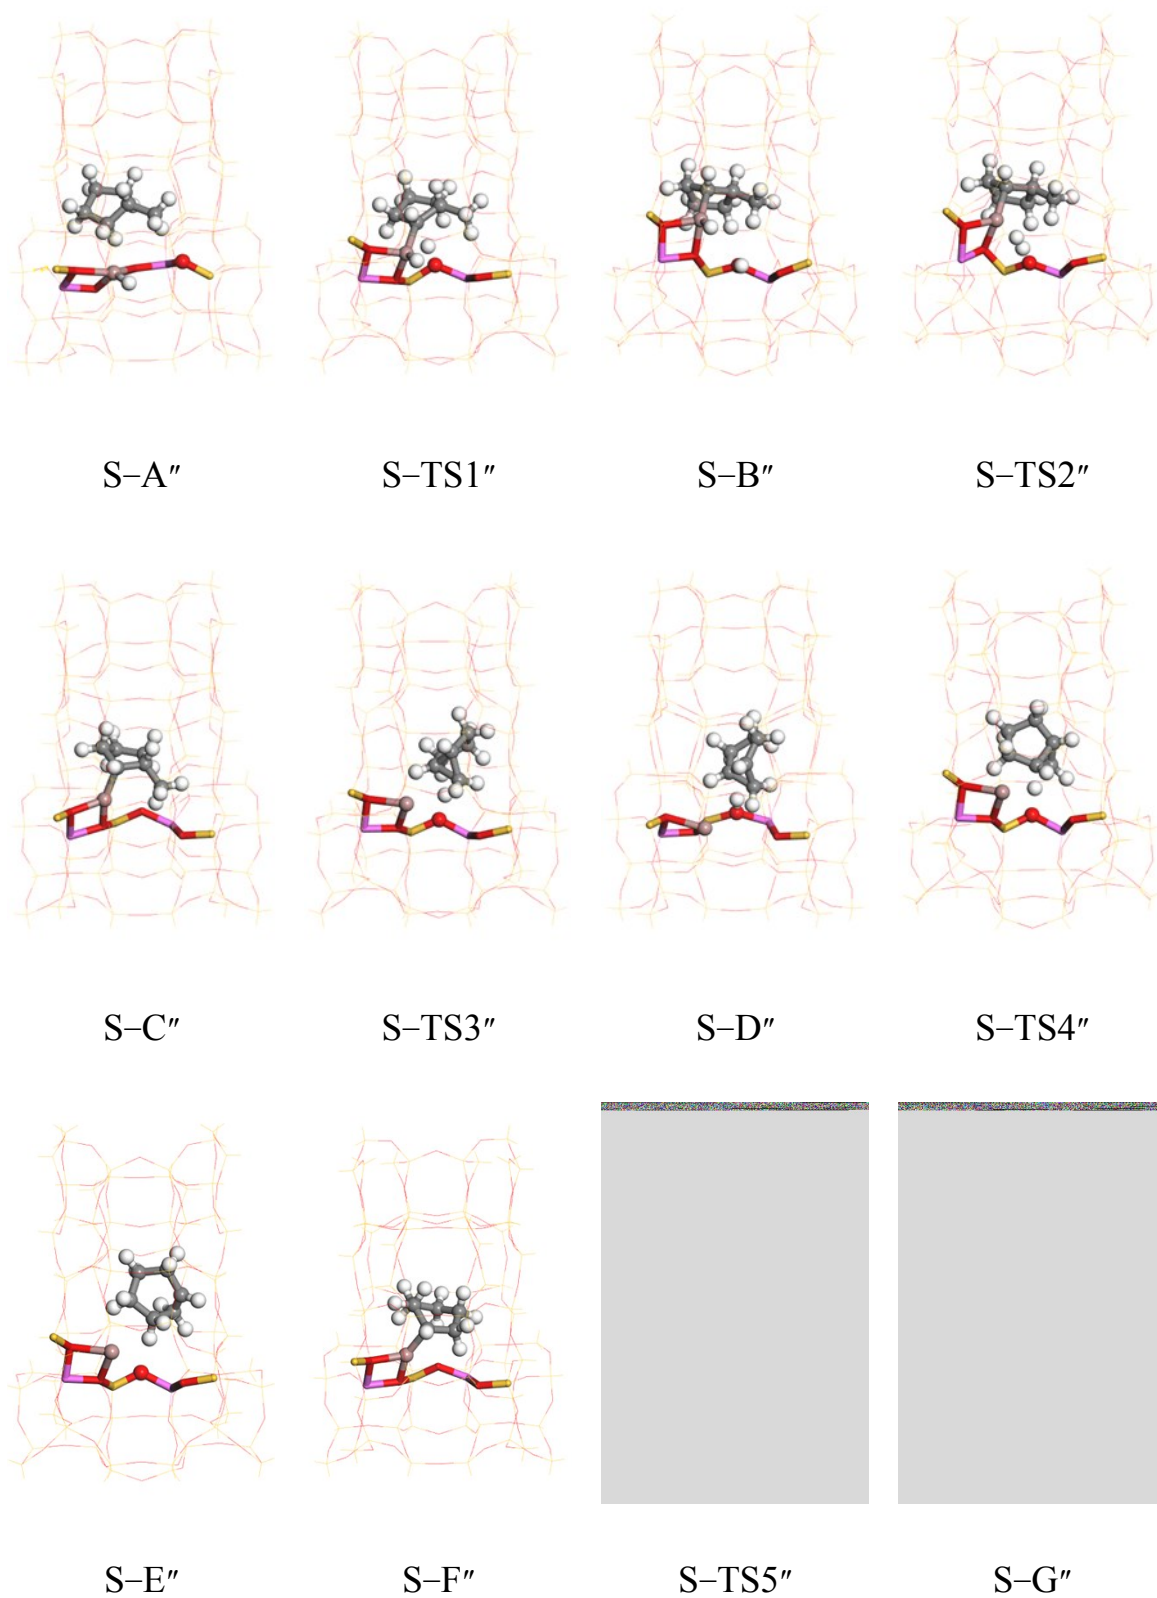

**Fig. S6** The geometry structures of reactants, products, intermediates and transition states of methylcyclopentane to cyclohexene through secondary carbon mechanism on Ga-ZSM-5.



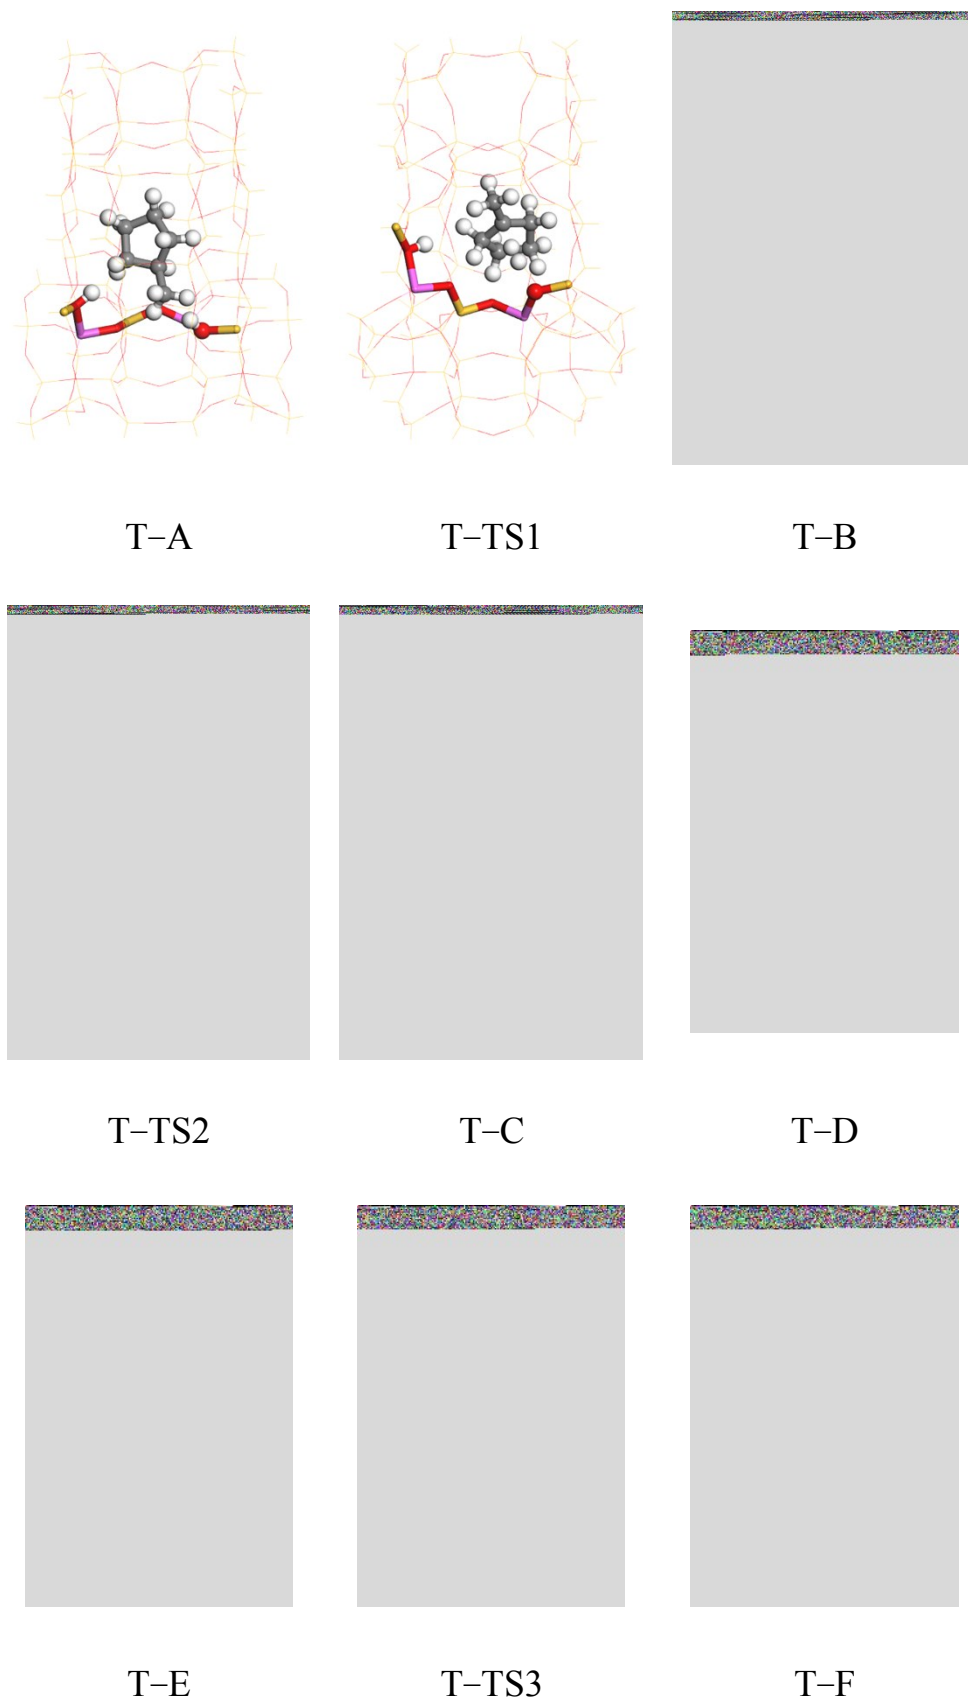

**Fig. S7** The geometry structures of reactants, products, intermediates and transition states of

methylcyclopentane to cyclohexene through tertiary carbon mechanism on H-Z<sub>1</sub>.

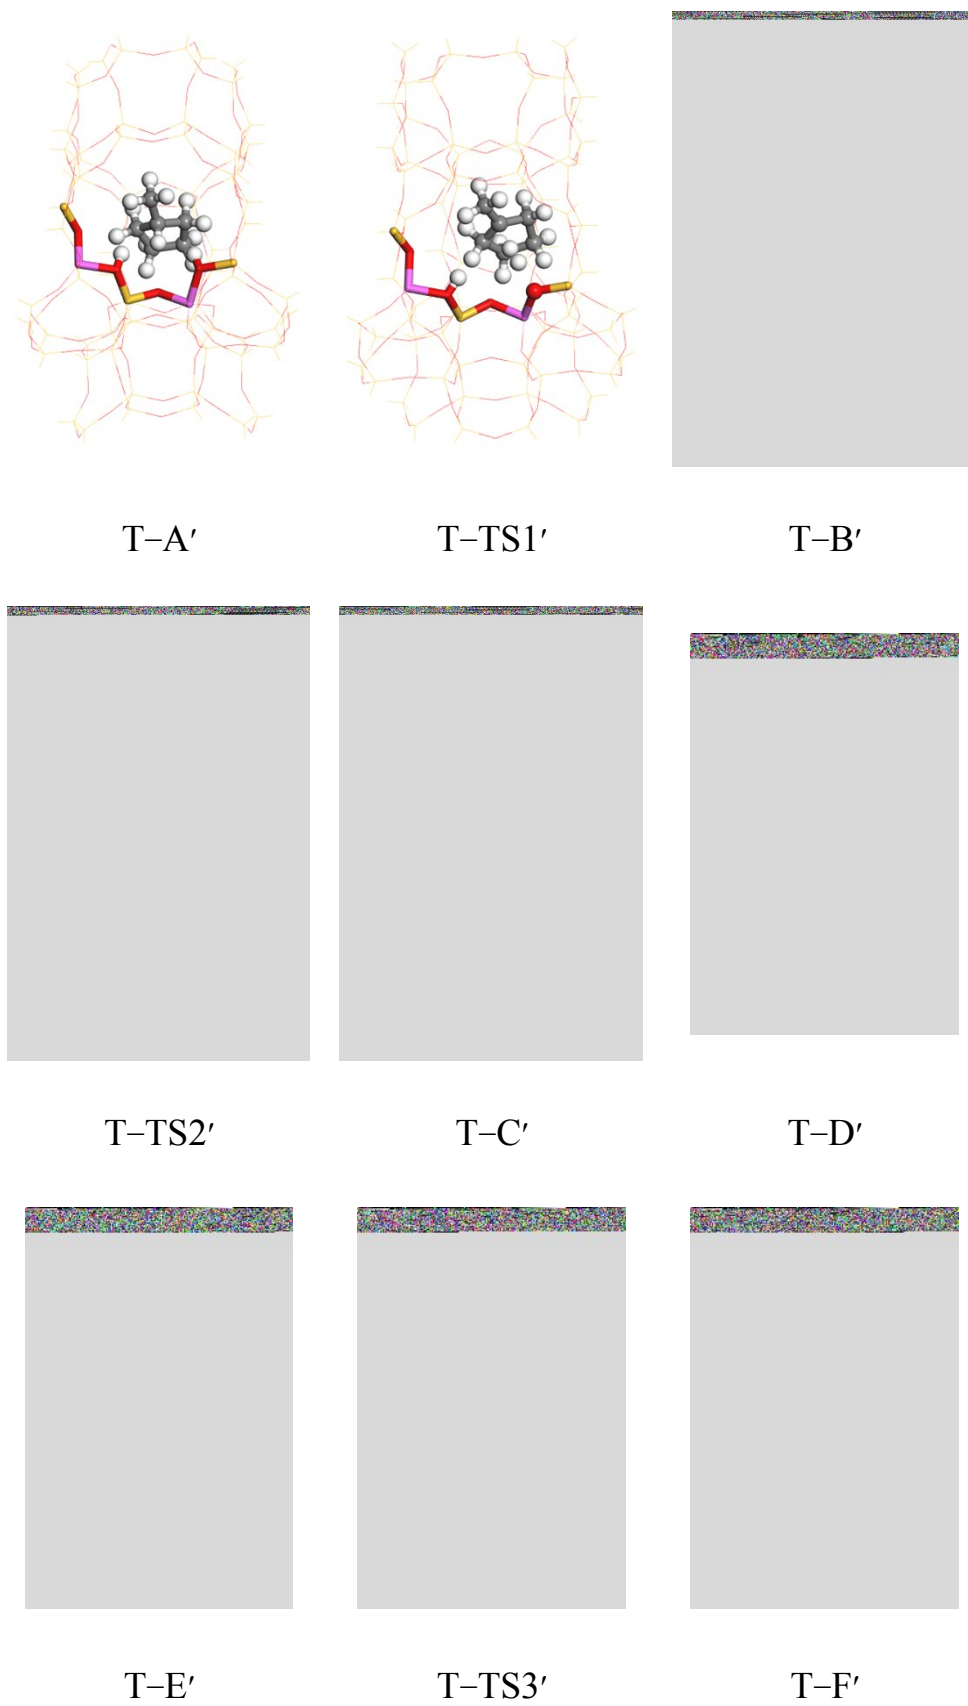

**Fig. S8** The geometry structures of reactants, products, intermediates and transition states of

methylcyclopentane to cyclohexene through tertiary carbon mechanism on  $H-Z_2$ .



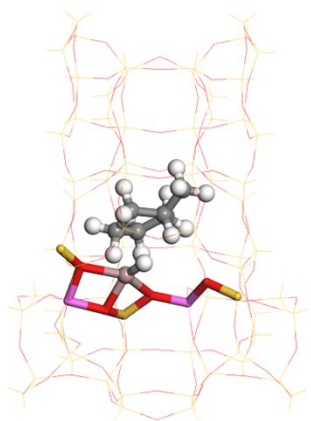

T-A''

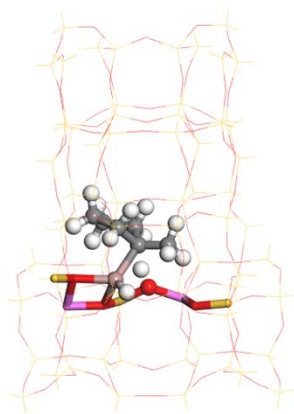

T-TS1''

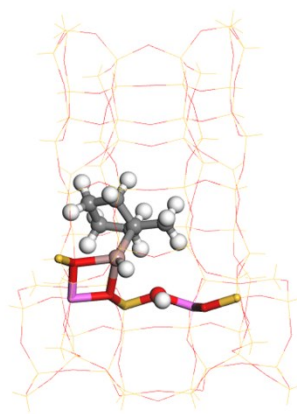

T-B''

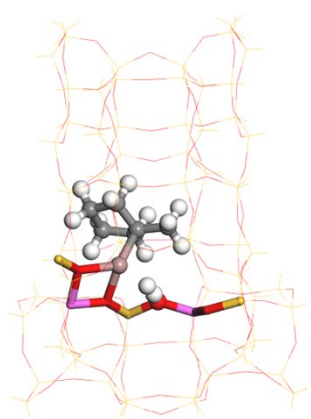

T-TS2''

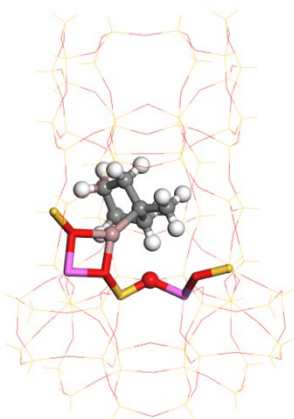

T-C''

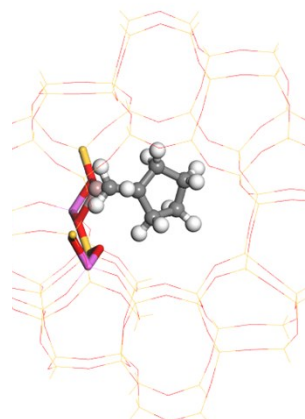

T-TS3''

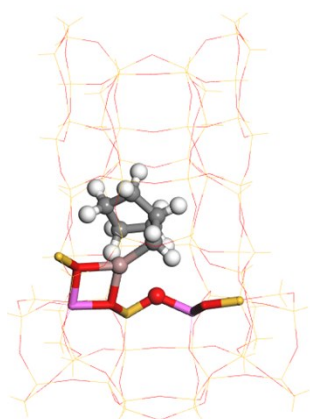

T-D''

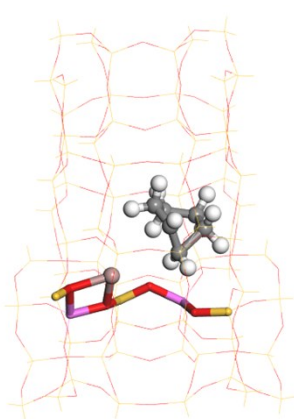

T-E''

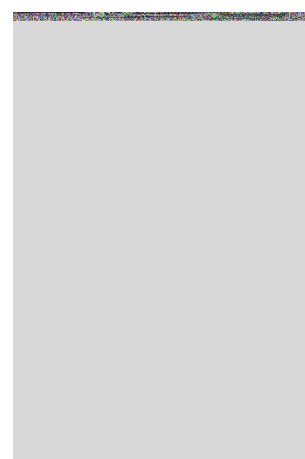

T-F''

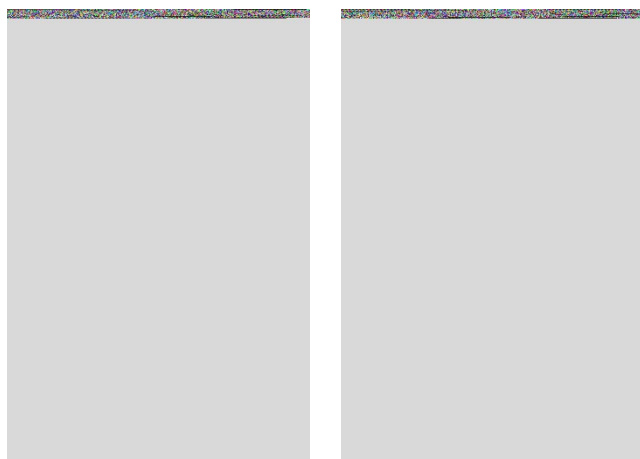

T-TS4"

T-G"

**Fig. S9** The geometry structures of reactants, products, intermediates and transition states of methylcyclopentane to cyclohexene through tertiary carbon mechanism on Ga-ZSM-5.

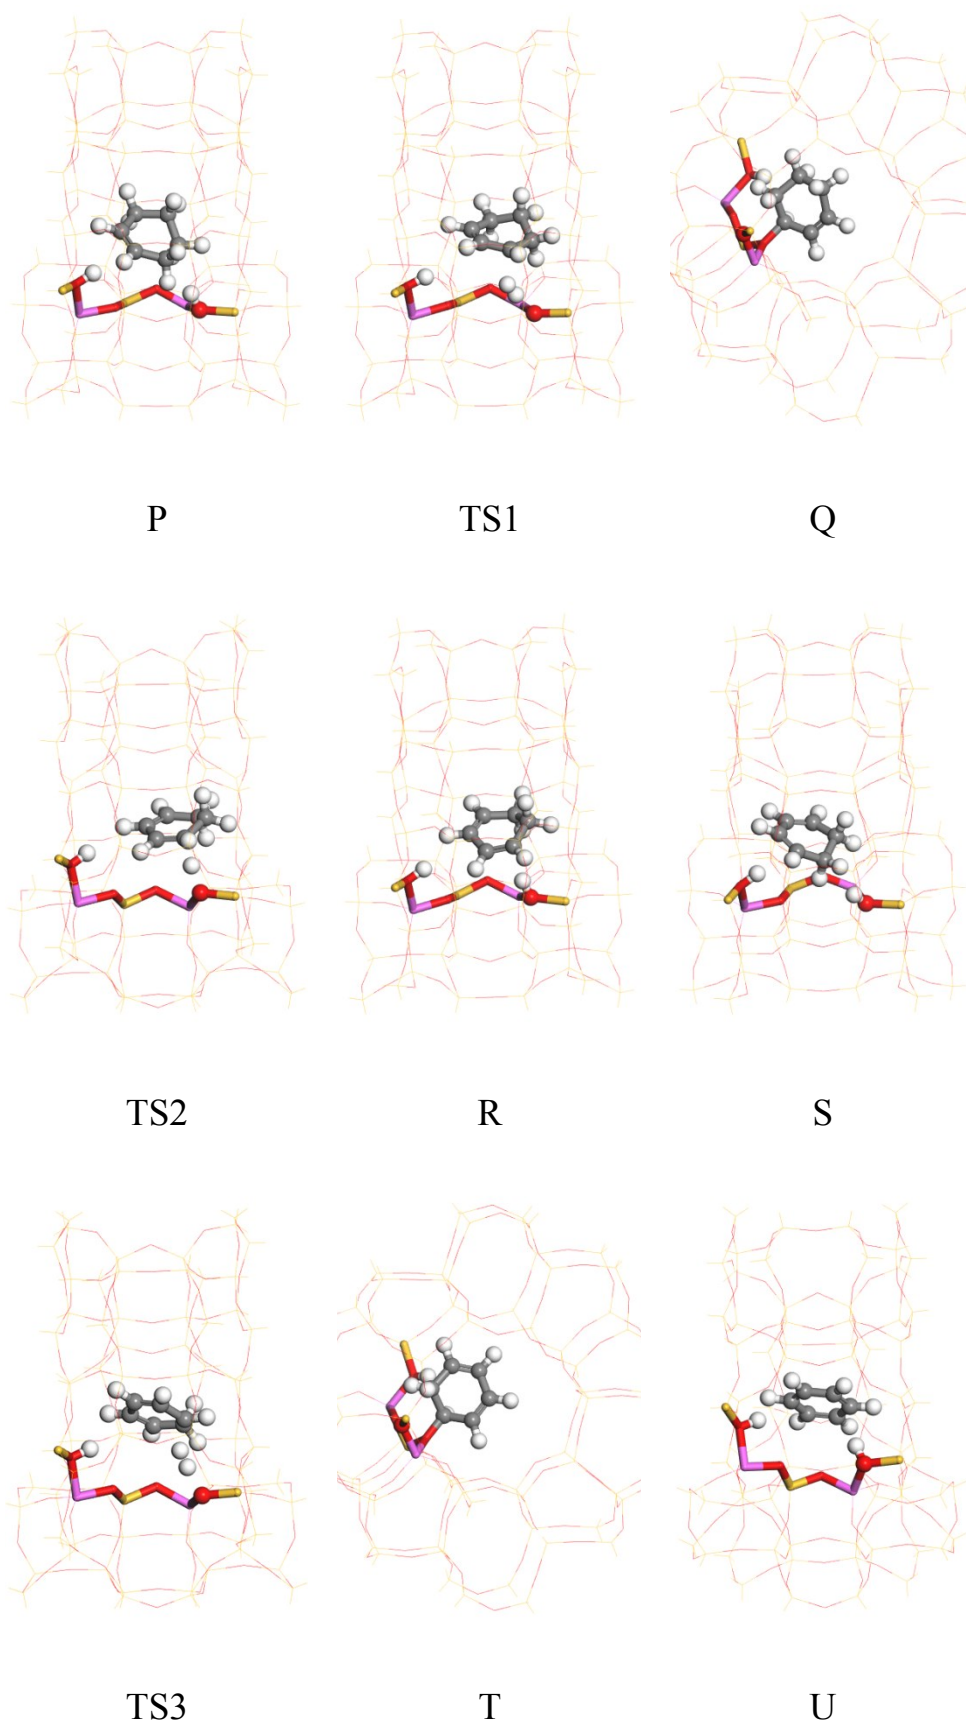

**Fig. S10** The geometry structures of reactants, products, intermediates and transition states of

cyclohexene to benzene on H-Z<sub>1</sub>.

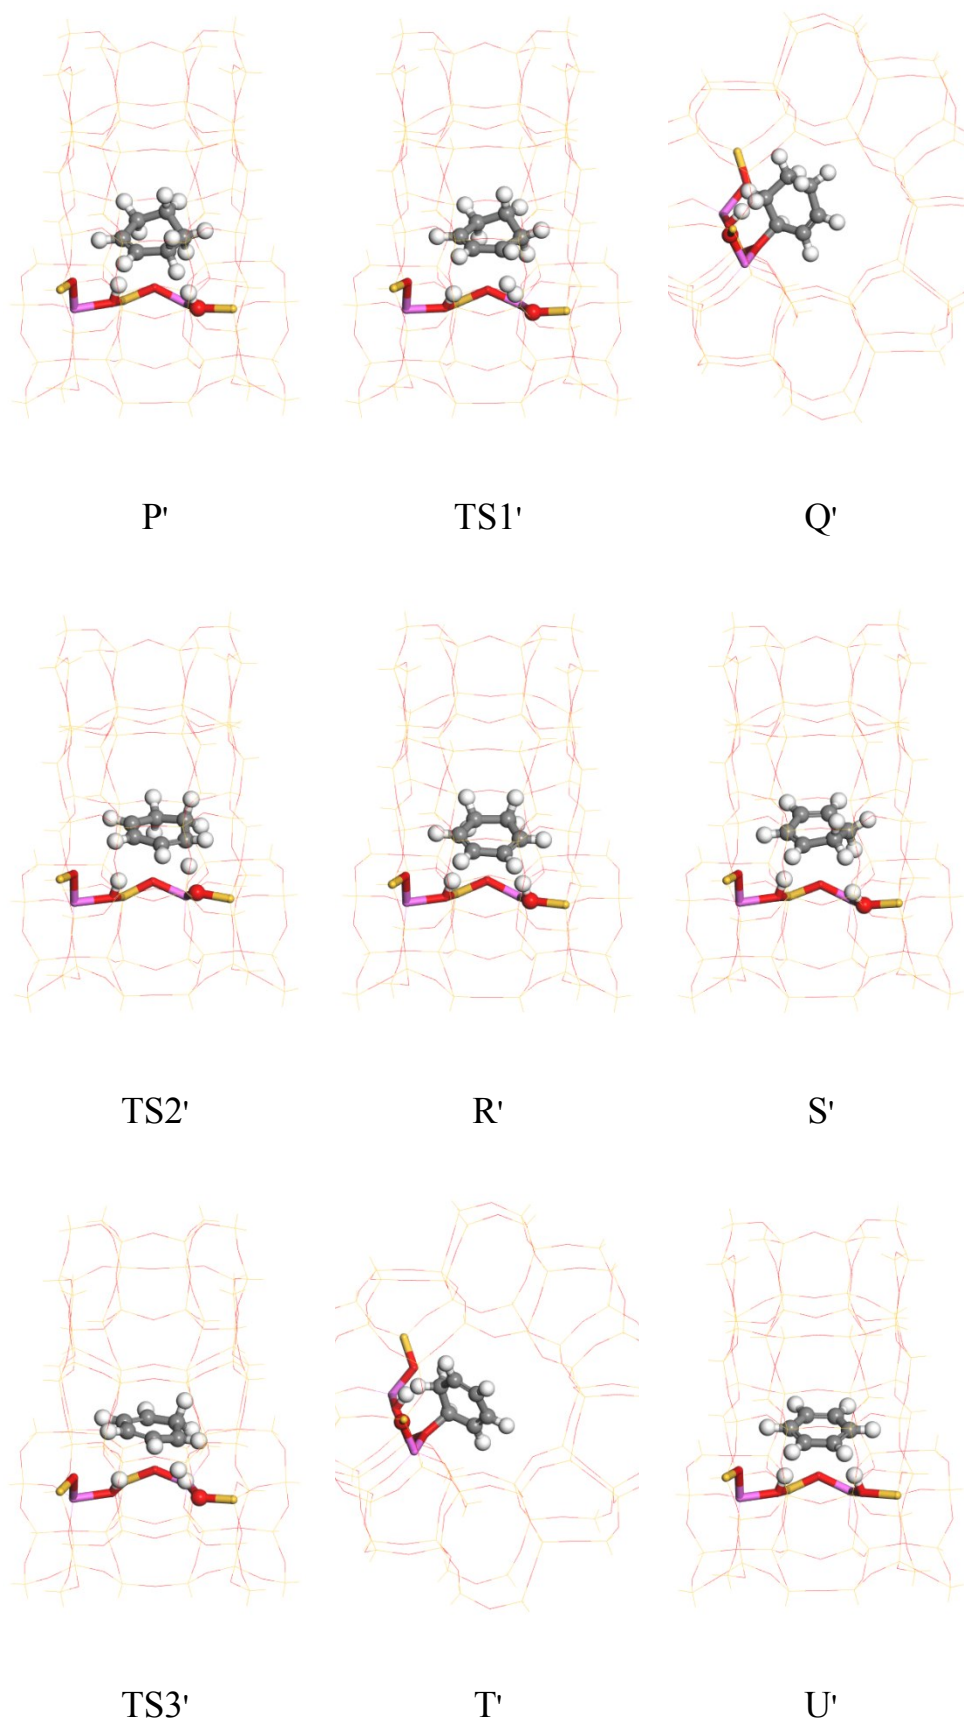

**Fig. S11** The geometry structures of reactants, products, intermediates and transition states of

cyclohexene to benzene on H-Z<sub>2</sub>.

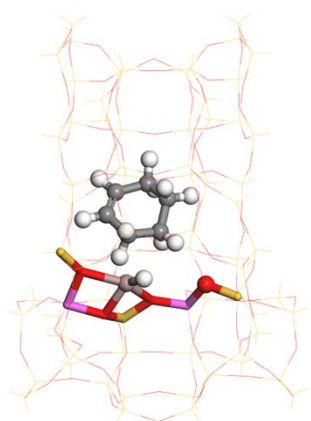

P''

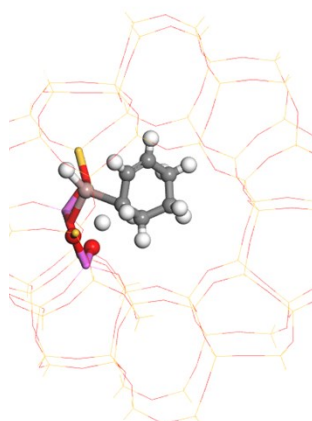

TS1''

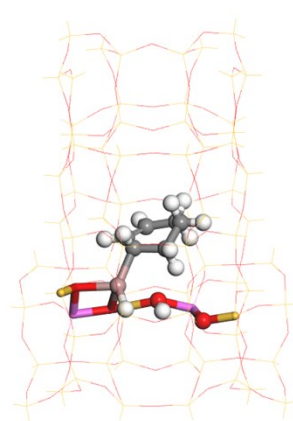

Q''

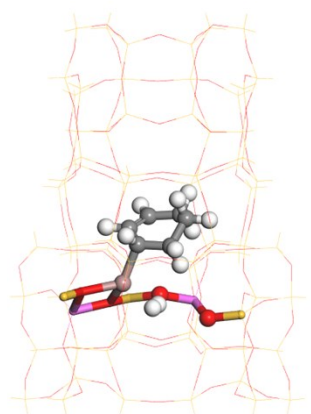

TS2''

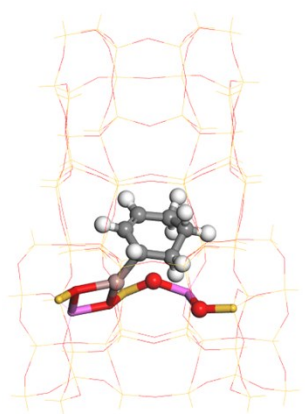

R''

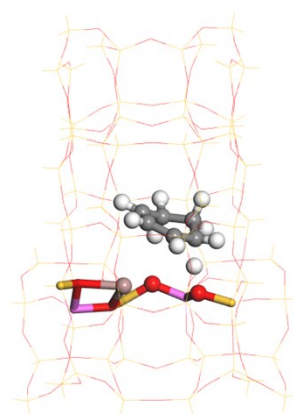

TS3''

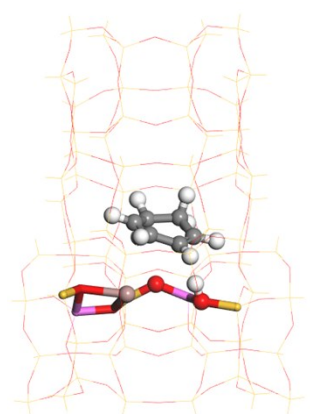

S''

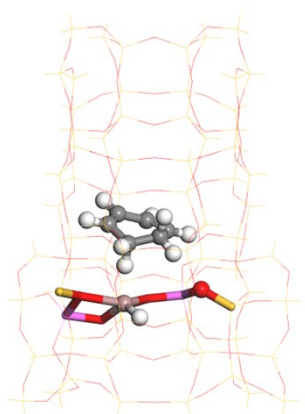

T''

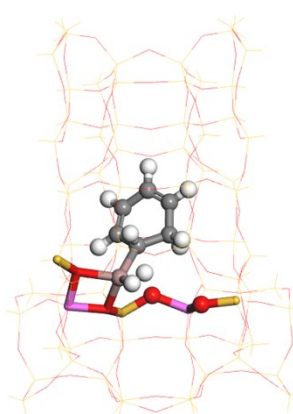

TS4''



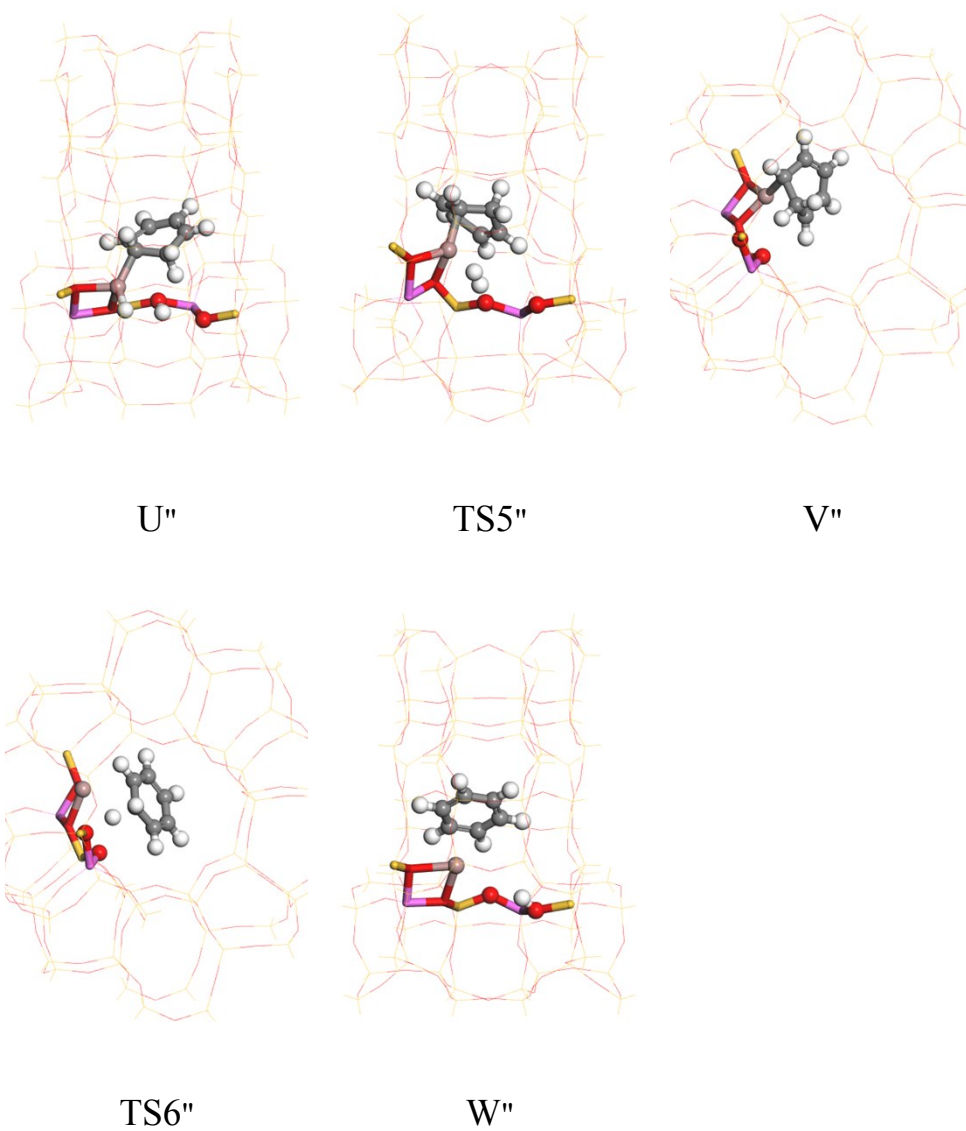

**Fig. S12** The geometry structures of reactants, products, intermediates and transition states of cyclohexene to benzene on Ga-ZSM-5.
